# Supplementary material
Source: PubMed Central journal article supplement (PMC2867321)
Supplement: supp_dev.042887_DEV042887TableS1.pdf [file supp_dev.042887_DEV042887TableS1.pdf]

**Table S1. Primers for RT-PCR**

| Gene                             | Forward primer (5' to 3')  | Reverse primer (5' to 3')  |
|----------------------------------|----------------------------|----------------------------|
| <i>wt1</i>                       | AAGACTGTGAGAGGGCGATTTTCTC  | CTTTCGTTGGCAGGTTTTGC       |
| <i>foxc2</i>                     | CTCAATCCTGGCGCAGACAT       | GCCGGTGAGAGTTGAACATTTC     |
| <i>tcf21</i>                     | CATAGCTCACCTGCGTCAAATT     | TCGGCTAGTGCTCACCCTTC       |
| <i>lmx1b</i>                     | ACATGAATCCTTATGGCAATGACA   | CAGTCGGTCAATGGGATTCC       |
| <i>mafb</i>                      | AGCGACGGACCCTAAAGAACA      | TGCTGAACCAGTTGGGTCTTC      |
| <i>nphs1</i>                     | CGATACGAGTGCGCTGTAGATAA    | AGTGCACCCCCTTGTGTATATCA    |
| <i>kirrel</i>                    | GGGACCCTGTGCATCTTTGT       | TCGCTCCCCGACATGTCTAC       |
| <i>ptpru</i>                     | CCAATTACATTCCGGGCTACA      | TTAATCCGGCGCTTCTCATT       |
| <i>nphs2</i>                     | CATCTCCAGTGCTTTCCAGTTG     | GCATCCAGAGCCACCTTTACTT     |
| <i><math>\alpha</math>-actin</i> | CGTACCACAGGTATCGTTCTTGAC   | TCTGTGAGGTCTCTACCAGCTAGGT  |
| <i>Ef-1<math>\alpha</math></i>   | CCTGAACCACCCAGGCCAGATTGGTG | GAGGGTAGTCAGAGAAGCTCTCCACG |
